# Supplementary material for: PhageLeads: Rapid Assessment of Phage Therapeutic Suitability Using an Ensemble Machine Learning Approach
Source: MDPI journal article supplement (doi:10.3390/v14020342), 2022-02-08
Supplement: s1 [file s1]

Table S1 : Performance metrics of temperate markers predictors

| <i>Predictor</i>          | <i>Dataset</i> | <i>Mean MCC</i> | <i>Mean F1</i> | <i>Mean AUC</i> | <i>Mean Accuracy</i> |
|---------------------------|----------------|-----------------|----------------|-----------------|----------------------|
| <i>Integrase</i>          | Original       | 0.92            | 0.92           | 0.94            | 0.99                 |
|                           | Filtered_75    | 0.94            | 0.94           | 0.95            | 0.99                 |
|                           | Filtered_100   | 0.94            | 0.94           | 0.95            | 0.99                 |
|                           | Filtered_125   | 0.94            | 0.94           | 0.95            | 0.99                 |
| <i>Cro/CI</i>             | Original       | 0.82            | 0.81           | 0.86            | 0.99                 |
|                           | Filtered_75    | 0.82            | 0.81           | 0.85            | 0.99                 |
|                           | Filtered_100   | 0.87            | 0.86           | 0.9             | 0.99                 |
|                           | Filtered_125   | 0.85            | 0.83           | 0.88            | 0.99                 |
| <i>Immunity repressor</i> | Original       | 0.83            | 0.83           | 0.9             | 0.99                 |
|                           | Filtered_75    | 0.88            | 0.88           | 0.91            | 0.99                 |
|                           | Filtered_100   | 0.92            | 0.91           | 0.93            | 0.99                 |
|                           | Filtered_125   | 0.95            | 0.94           | 0.96            | 0.99                 |
| <i>ParA</i>               | Original       | 0.88            | 0.88           | 0.9             | 0.99                 |
| <i>Antirepressor</i>      | Original       | 0.87            | 0.86           | 0.9             | 0.99                 |
|                           | Filtered_75    | 0.91            | 0.9            | 0.92            | 0.99                 |
|                           | Filtered_100   | 0.86            | 0.85           | 0.89            | 0.99                 |
|                           | Filtered_125   | 0.9             | 0.89           | 0.91            | 0.99                 |

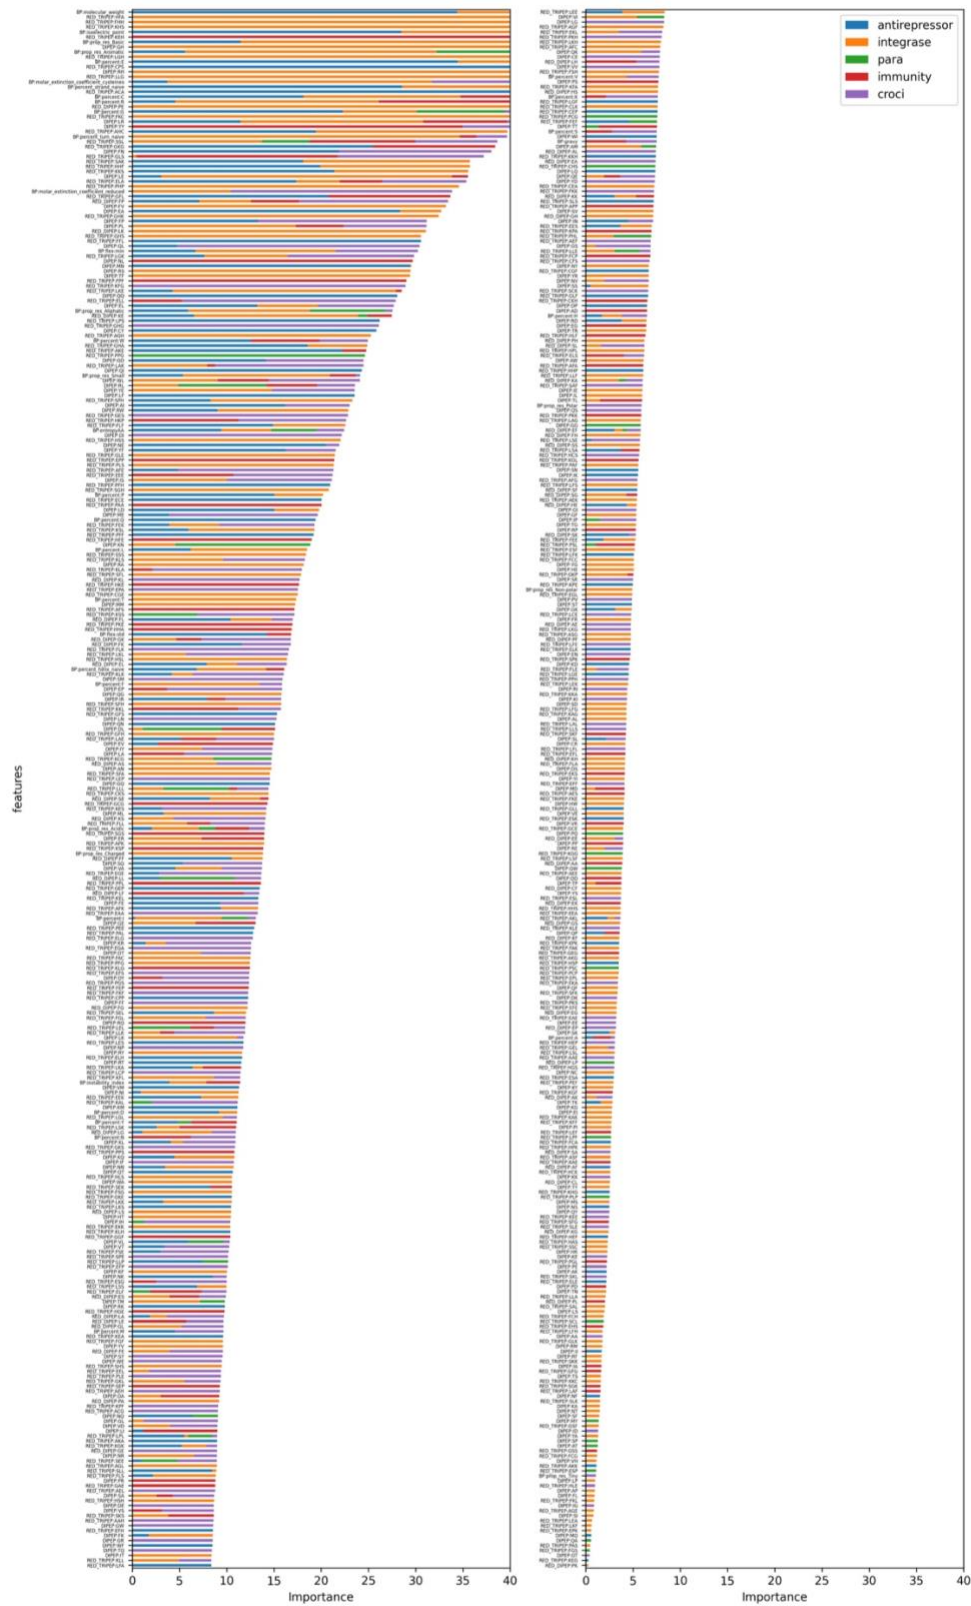

**Figure S1:** Feature importance scores of features used for temperate markers predictors
